# Supplementary material
Source: bioRxiv or medRxiv preprint supplement (https://www.medrxiv.org/highwire/filestream/97883/field_highwire_adjunct_files/0/2020.09.21.20198309-1.pdf)
Supplement: Supplementary file [file 2020.09.21.20198309-1.pdf]

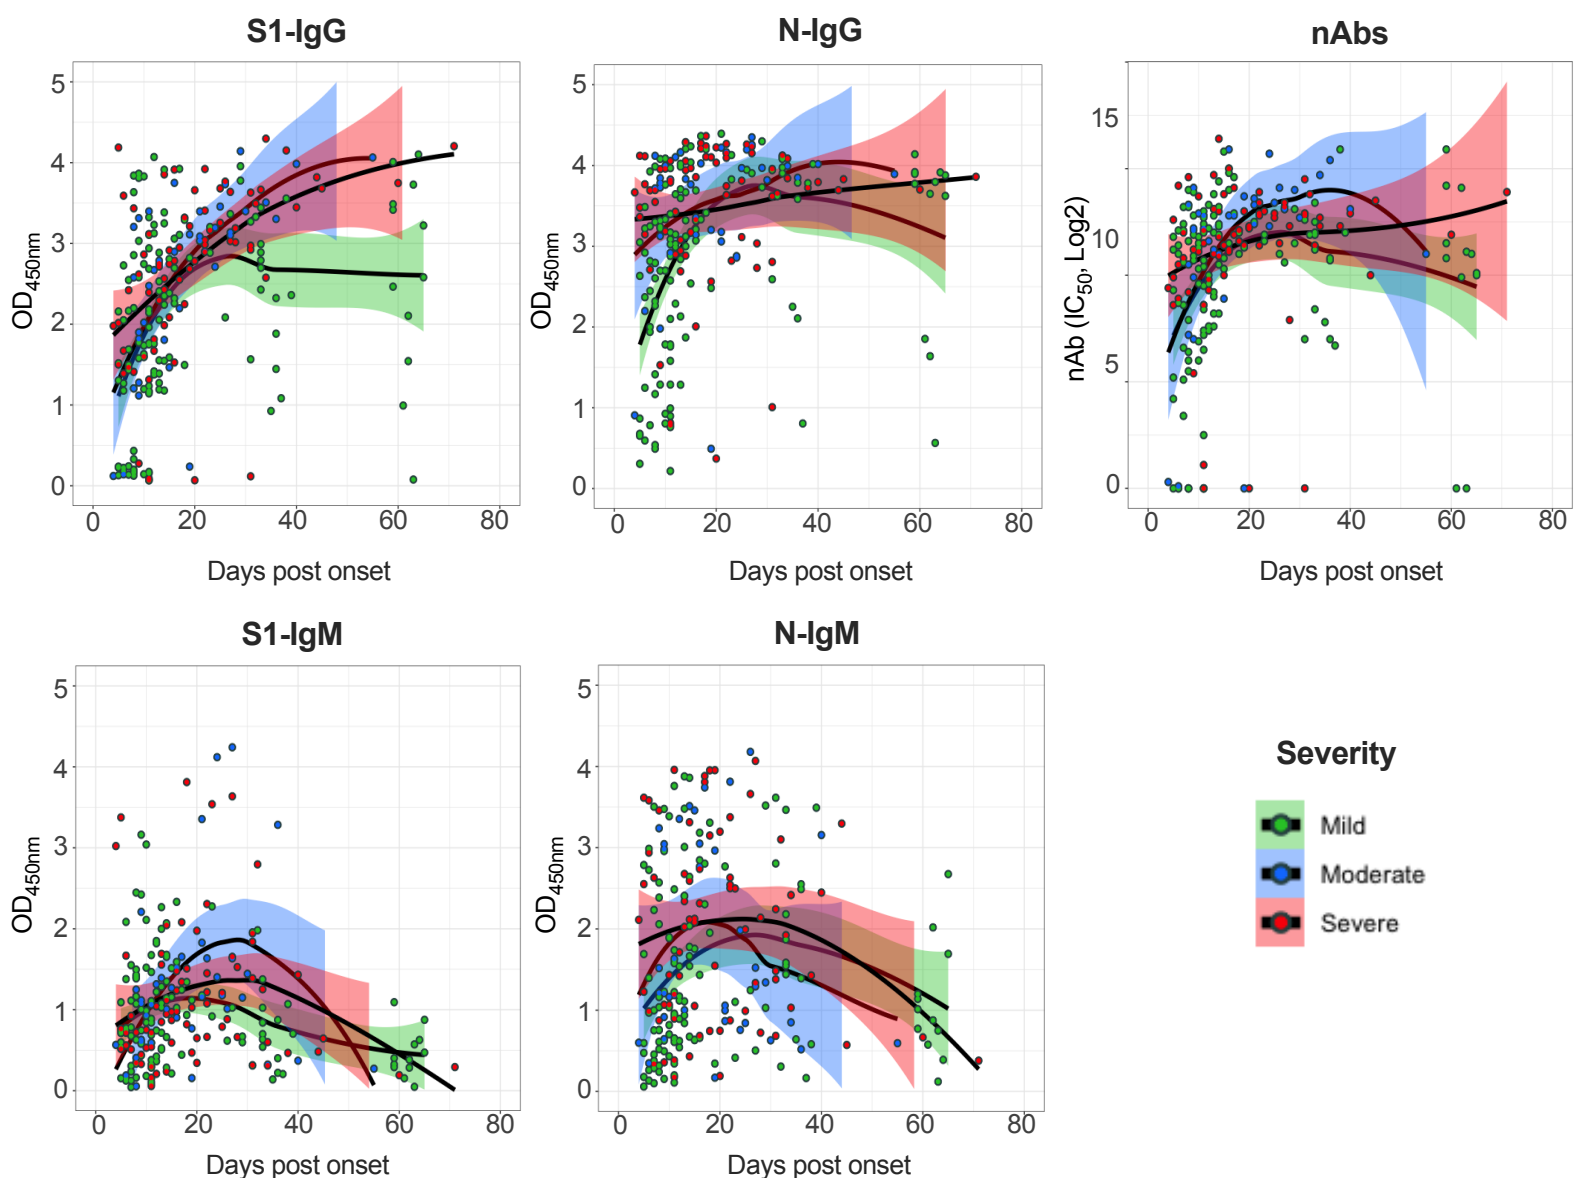

**Supplementary Figure 1. Kinetics of SARS-CoV-2 specific antibodies over time based on disease severity.** OD values of S1- and N-specific IgG and IgM (S1-IgG, S1-IgM, N-IgG and N-IgM) and neutralizing titers (IC<sub>50</sub>) are plotted against the days post disease onset. The line and the ribbon show the mean expected from a LOESS regression model with 95% confidence interval for each disease severity category. The colored circles indicate disease severity. OD = optical density.
